# Supplementary material for: Identification of Phonology-Related Genes and Functional Characterization of Broca’s and Wernicke’s Regions in Language and Learning Disorders
Source: Front Neurosci. 2021 Sep 3;15:680762. doi: 10.3389/fnins.2021.680762 (PMC8446646; doi:10.3389/fnins.2021.680762)
Supplement: Supplementary Table 1 — Overview of phonological deficits in the four investigated disorders. [file Table_1.XLSX]

## Sheet: S1
Table S1. Phonologial processing domains underlying dyslexia, dyscalculia, SLI, and lvPPA.
Phonologial processing domain	Dyslexia	Dyscalculia	SLI	lvPPA
Phonological awareness	X1,2,3		X10,11,12
Phonological working memory	X1,4,5,6	X7,8,9	X13	X14,15
Phonological representations	X2	X8	X11,12	X14,15
Rapid automatized naming	X3
Footnotes:
X major deficit
X minor deficit
References:
1 Child et al., 2019
2 Pennington & Bishop, 2009
3 Thompson et al., 2015
4 De Carvalho et al., 2014
5 Hasselhorn et al, 2010
6 Steinbrink et al., 2008
7 De Smedt, 2018
8 De Smedt & Boets, 2010
9 Raghubar et al., 2010
10 American Psychiatric Association, 2013
11 Claessen & Leitão, 2012
12 Lewis et al., 2011
13 Torrens & Yagüe, 2016
14 Gorno-Tempini et al., 2008
15 Henry et al., 2016
