# Supplementary material for: Identification of Phonology-Related Genes and Functional Characterization of Broca’s and Wernicke’s Regions in Language and Learning Disorders
Source: Front Neurosci. 2021 Sep 3;15:680762. doi: 10.3389/fnins.2021.680762 (PMC8446646; doi:10.3389/fnins.2021.680762)
Supplement: Supplementary Table 2 — Overview of studies on Broca’s and Wernicke’s regions in humans and model organisms. [file Table_2.XLSX]

## Sheet: S2
Table S2. Overview of studies on Broca's and Wernicke's regions in humans and model organisms.
Study	Approach / anatomical regions / genes / species
Abrahams et al. (2007); Wang et al. (2015); Zhao et al. (2015)	Several studies on the expression of specific genes that are known to be relevant for speech disorders in Broca's region; especially studies on FOXP2. Zhao / Wang - no gene expression analysis at all. Abrahams - no gene expression analysis in Broca.
Anthoni et al. (2007)	Study on the expression of genes associated with language disorders: Comparison of the genes C2ORF3 and MRPL19 in the adult human brain and in the fetal human brain; neitherot Broca's nor Wernicke's region were analyzed.
Han et al. (2014)	Expression of the genes CNTNAP2 and FOXP2, two relevant genes for speech disorders, in human brain regions that are responsible for speech motor skills; Broca's region and other brain regions. Overall, five genes (CNTNAP2, FOXP2, GNPTAB, GNPTG, NAGPA) were analyzed in 27 regions including Broca but not Wernicke. Microarray data from Allen Human Brain Atlas was used (the two individuals providing …
Johnson et al. (2009); Lambert et al. (2011)	Fetal brain development: Comparison of regional gene expression patterns of the perisylvic region (Johnson et al. 2009) / the precursor structures of Broca's and Wernicke's region (Lambert et al. 2011) and other brain regions.
Kato et al. (2014)	Study on gene expression of CMIP, CNTNAP2, DCDC2, FOXP1, FOXP2, KIAA0319 and ROBO1 (genes that are known to be relevant for speech disorders) in different brain regions of marmosets; Broca's and Wernicke's region and other analysed brain regions
Khaitovich et al. (2004a, 2004b); Oh et al. (2014); Oldham et al. (2006)	Comparison of regional gene expression patterns in Broca's region and other brain regions of chimpanzees and humans. No findings for Broca and Wernicke.
Newbury et al. (2011)	Study on genetic aspects of SLI and DysL due to their common co-occurrence and identified common genetic factors for different language traits for this reason, e.g. KIAA0319 and oral language ability. No gene expression analysis at all.
Schneider et al. (2012)	Study on the expression of genes that are relevant for speech disorders: Comparison of gene expression between human and non-human primates; frontal cortex as target region; neither Broca's nor Wernicke's region were analyzed.
Simões et al. (2010)	Expression of selected genes in Broca's region and other brain regions of marmoset monkeys (primate). Immunohistochemistry of EGR1 protein, no gene expression analysis at all.
Teramitsu et al. (2010)	Comparison of mRNA expression of FOXP2 in the striatum and surrounding regions in zebra finches.
References from Table S1:
Abrahams, B.S., Tentler, D., Perederiy, J.V., Oldham, M.C., Coppola, G., & Geschwind, D.H. (2007). Genome-wide analyses of human perisylvian cerebral cortical patterning. Proceedings of the National Academy of Sciences, 104(45), 17849-17854.
Anthoni, H., Sucheston, L.E., Lewis, B.A., Tapia-Páez, I., Fan, X., Zucchelli, M., ... Kere, J. (2012). The aromatase gene CYP19A1: several genetic and functional lines of evidence supporting a role in reading, speech and language. Behavioral Genetics, 42(4), 509-527.
Han, T., Park, J., Domingues, C.F., Moretti-Ferreira, D., Paris, E., Sainz, E., .. Drayna, D. (2014). A study of the role of the FOXP2 and CNTNAP2 genes in persistent developmental stuttering. Neurobiology of Disease, 69, 23-31.
Johnson, M.B., Kawasawa, Y.I., Mason, C.E., Krsnik, Ž., Coppola, G., Bogdanović, D., ... Šestan, N. (2009). Functional and evolutionary insights into human brain development through global transcriptome analysis. Neuron, 62(4), 494-509.
Kato, M., Okanoya, K., Koike, T., Sasaki, E., Okano, H., Watanabe, S., & Iriki, A. (2014). Human speech- and reading-related genes display partially overlapping expression patterns in the marmoset brain. Brain and Language, 133, 26-38.
Khaitovich, P., Muetzel, B., She, X., Lachmann, M., Hellmann, I., Dietzsch, J., ... Pääbo, S. (2004a). Regional patterns of gene expression in human and chimpanzee brains. Genome Research, 14(8), 1462-1473.
Khaitovich, P., Weiss, G., Lachmann, M., Hellmann, I., Enard, W., Muetzel, B., ... Pääbo, S. (2004b). A neutral model of transcriptome evolution. PLoS Biology, 2(5), 682-689.
Lambert, N., Lambot, M.A., Bilheu, A., Albert, V., Englert, Y., Libert, F., ... Vanderhaeghen, P. (2011). Genes expressed in specific areas of the human fetal cerebral cortex display distinct patterns of evolution. PLoS One, 6(3), e17753.
Newbury, D.F., Paracchini, S., Scerri, T.S., Winchester, L., Addis, L., Richardson, A.L., … Monaco, A.P. (2011). Investigation of Dyslexia and SLI Risk Variants in Reading- and Language-Impaired Subjects. Behavior genetics, 41(1), 90-104.
Oh, K., Hwang, T., Cha, K., & Yi, G. S. (2014). Functional module-centric interpretation of transcriptomic change between human and chimpanzee cerebral cortex. In IEEE, International Conference on Bioinformatics and Biomedicine (P. 162-167).
Oldham, M.C., Horvath, S., & Geschwind, D.H. (2006). Conservation and evolution of gene coexpression networks in human and chimpanzee brains. Proceedings of the National Academy of Sciences, 103(47), 17973-17978.
Schneider, E., Jensen, L.R., Farcas, R., Kondova, I., Bontrop, R.E., Navarro, B., ... Haaf, T. (2012). A high density of human communication-associated genes in chromosome 7q31-q36: differential expression in human and non-human primate cortices. Cytogenetic and Genome Research, 136(2), 97-106.
Simões, C.S., Vianney, P.V.R., Marcondes de Moura, M., Freire, M.A.M., Mello, L.E., Sameshima, K., ... Ribeiro, S. (2010). Activation of frontal neocortical areas by vocal production in marmoset. Frontiers in Integrative Neuroscience, 4, 1-12.
Teramitsu, I., Poopatanapong, A., Torrisi, S., & White, S.A. (2010). Striatal FoxP2 Is Actively Regulated during Songbird Sensorimotor Learning. PLoS One, 5(1), e8548.
Wang, R., Chen, C.C., Hara, E., Rivas, M.V., Roulhac, P.L., Howard, J.T., ... Jarvis, E.D. (2015). Convergent differential regulation of SLIT-ROBO axon guidance genes in the brains of vocal learners. Journal of Comparative Neurology, 523(6), 892-906.
Zhao, Y.J., Wang, Y.P., Yang, W.Z., Sun, H.W., Ma, H.W., & Zhao, Y.R. (2015). CNTNAP2 is significantly associated with speech sound disorder in the Chinese Han population. Journal of Child Neurology, 30(13), 1806-1811.
