# Supplementary material for: Identification of Phonology-Related Genes and Functional Characterization of Broca’s and Wernicke’s Regions in Language and Learning Disorders
Source: Front Neurosci. 2021 Sep 3;15:680762. doi: 10.3389/fnins.2021.680762 (PMC8446646; doi:10.3389/fnins.2021.680762)
Supplement: Supplementary Table 3 — Literature evaluation—The eleven single searches using PubMed Advanced Search. [file Table_3.XLSX]

## Sheet: S3
Table S3. Literature evaluation - The eleven single searches using PubMed Advanced Search.
Search	Combination of language/learning disorders
1	DysC, DysL, lvPPA, SLI
2	DysC, DysL, lvPPA
3	DysC, DysL, SLI
4	DysC, lvPPA, SLI
5	DysL, lvPPA, SLI
6	DysC, DysL
7	DysC, lvPPA
8	DysC, SLI
9	DysL, lvPPA
10	DysL, SLI
11	lvPPA, SLI
