# Supplementary material for: Identification of Phonology-Related Genes and Functional Characterization of Broca’s and Wernicke’s Regions in Language and Learning Disorders
Source: Front Neurosci. 2021 Sep 3;15:680762. doi: 10.3389/fnins.2021.680762 (PMC8446646; doi:10.3389/fnins.2021.680762)
Supplement: Supplementary Table 4 — Literature evaluation—PubMed Advanced Search combining clinical categories and genetic terms for the identification of phonology-related genes. [file Table_4.xlsx]

## Sheet: S4
Table S4. Literature evaluation - PubMed Advanced Search combining clinical categories and genetic terms for the identification of phonology-related genes.
Clinical categories		Genetic terms
DysC:	AND	(gene OR genes OR candidate gene OR candidate genes OR genetic OR genetics OR genetical OR genetically OR genome OR gene expression genetic expression OR genetic analysis OR genetic analyses OR single-nucleotide polymorphism OR single-nucleotide polymorphisms OR SNP OR SNPs OR genome-wide association study OR genome-wide association studies OR GWAS OR candidate gene study OR candidate gene studie…
(arithmetical weakness OR dyscalculia OR impairment in arithmetics OR math difficulty OR math difficulties OR mathematical disability OR mathematical disabilities OR mathematics disability OR mathematics disabilities OR math learning disability OR math learning disabilities OR numerical deficit OR numerical deficits OR (learning difficulty AND math) OR (learning difficulties AND math) OR (learnin…
DysL:
(developmental dyslexia OR dyslexia OR dyslexic OR dyslexics OR reading difficulty OR reading difficulties OR reading disability OR reading disabilities OR reading disorder OR reading disorders OR reading impairment OR reading impairments OR (learning difficulty AND reading) OR (learning difficulties AND reading) OR (learning disability AND reading) OR (learning disabilities AND reading)
lvPPA:
(primary progressive aphasia OR PPA OR progressive phonological aphasia OR lvPPA OR lv-PPA OR PPA-L OR LPPA)
SLI:
(developmental language disorder OR developmental language disorders OR language development disorder OR language development disorders OR SLI OR specific language impairment OR speech developmental disorders OR speech sound disorder OR speech sound disorders OR (language disorder AND child) OR (language disorders AND child) OR (language disorder AND children) OR (language disorders AND children)…
