# Supplementary material for: Identification of Phonology-Related Genes and Functional Characterization of Broca’s and Wernicke’s Regions in Language and Learning Disorders
Source: Front Neurosci. 2021 Sep 3;15:680762. doi: 10.3389/fnins.2021.680762 (PMC8446646; doi:10.3389/fnins.2021.680762)
Supplement: Supplementary Table 5 — Literature evaluation—Clinical categories found in research articles. [file Table_5.XLSX]

## Sheet: S5
Table S5. Literature evaluation - Clinical categories found in research articles.
Disorder	Synonyms
DysC	Mathematics disability, reduced mathematical skills
DysL	Developmental dyslexia (DD), dyslexia, reading disorder, reading disability (RD)
lvPPA	Logopenic/phonological aphasia variant (LPA), logopenic progressive aphasia (lvPPA), primary progressive aphasia (PPA) - logopenic variant (lvPPA)
SLI	Langauge disability, language impairment (LI), specific language impairment (SLI), speech sound disorder (SSD)
