# Supplementary material for: Identification of Phonology-Related Genes and Functional Characterization of Broca’s and Wernicke’s Regions in Language and Learning Disorders
Source: Front Neurosci. 2021 Sep 3;15:680762. doi: 10.3389/fnins.2021.680762 (PMC8446646; doi:10.3389/fnins.2021.680762)
Supplement: Supplementary Table 6A — Gene expression analysis—Random genes used as negative control. [file Table_6.XLSX]

## Sheet: S6A
Table S6A. Gene expression analysis - Random genes used as negative control.
Gene1	ENTREZ ID2	ENSEMBL ID3
C8orf33	65265	ENSG00000182307
FZD10	11211	ENSG00000111432
TNIP1	10318	ENSG00000145901
SHOC14	158401	ENSG00000165181
NPIPB45	440345	ENSG00000185864
ASAH1	427	ENSG00000104763
ASPM	259266	ENSG00000066279
PTCD1	26024	ENSG00000106246
FBXW11	23291	ENSG00000072803
CBFB	865	ENSG00000067955
GREM1	26585	ENSG00000166923
CERKL	375298	ENSG00000188452
LENEP	55891	ENSG00000163352
HTR3C	170572	ENSG00000178084
GPS2	2874	ENSG00000132522
LCE5A	254910	ENSG00000186207
THAP7-AS16	439931	ENSG00000230513
KLHL34	257240	ENSG00000185915
ELAVL2	1993	ENSG00000107105
SSR4P1	728039	ENSG00000235374
OR5D13	390142	ENSG00000279761
FNDC8	54752	ENSG00000073598
TMEM206	55248	ENSG00000065600
GDF2	2658	ENSG00000263761
SIGMAR1	10280	ENSG00000147955
Footnotes:
1 Gene symbols from HGNC, an online database from the Human Genome Organisation (HUGO).
2 Identifier (ID) from ENTREZ, an online cross-database search system from the National Center for Biotechnology Information (NCBI), USA.
3 Identifier (ID) from ENSEMBL, the European equivalent to ENTREZ from the European Bioinformatics Institute and the Wellcome Trust Sanger Institute.
4 Previous symbol C9orf84
5 Previous symbol 61E3.4
6 Previous symbol AC002472.9

## Sheet: S6B
Table S6B. Gene expression analysis - Color genes used as negative control.
Gene1	ENTREZ ID2	ENSEMBL ID3
ASIP	434	ENSG00000101440
BNC2	54796	ENSG00000173068
EIF2S2	8894	ENSG00000125977
GSS	2937	ENSG00000100983
HERC2	8924	ENSG00000128731
IRF4	3662	ENSG00000137265
MC1R	4157	ENSG00000258839
OCA2	4948	ENSG00000104044
RALY	22913	ENSG00000125970
SLC24A4	123041	ENSG00000140090
SLC24A5	283652	ENSG00000188467
SLC45A2	51151	ENSG00000164175
TYR	7299	ENSG00000077498
VASH2	79805	ENSG00000143494
Footnotes:
1 Gene symbols from HGNC, an online database from the Human Genome Organisation (HUGO).
2 Identifier (ID) from ENTREZ, an online cross-database search system from the National Center for Biotechnology Information (NCBI), USA.
3 Identifier (ID) from ENSEMBL, the European equivalent to ENTREZ from the European Bioinformatics Institute and the Wellcome Trust Sanger Institute.
