# Supplementary material for: Identification of Phonology-Related Genes and Functional Characterization of Broca’s and Wernicke’s Regions in Language and Learning Disorders
Source: Front Neurosci. 2021 Sep 3;15:680762. doi: 10.3389/fnins.2021.680762 (PMC8446646; doi:10.3389/fnins.2021.680762)
Supplement: Supplementary Table 7A — Literature evaluation—The 36 excluded review articles. [file Table_7.xlsx]

## Sheet: S7A
Table S7A. Literature evaluation - The 36 excluded review articles.
Combination of language and learning disorders	Author	Year	PMID
DysL, SLI	Berninger & Richards	2010	20953351
DysL, SLI	Bishop	2015	25854887
DysL, SLI	Carrion-Castillo	2013	24133036
DysL, SLI	Deriziotis & Fisher	2017	28781152
DysL, SLI	Eicher & Gruen	2013	23916419
DysL, SLI	Germanò et al.	2010	20721770
DysL, SLI	Giraud & Ramus	2013	23040541
DysL, SLI	Habib & Giraud	2013	23622168
lvPPA, SLI	Harciarek & Kertesz	2011	21809067
lvPPA, SLI	Irwin et al.	2015	25549971
DysL, SLI	Kang & Drayna	2011	21663442
DysL, SLI	Kere	2014	25078623
DysL, SLI	Landi & Perdue	2019	31844423
DysL, SLI	Mascheretti et al.	2017	28045463
DysC, DysL; DysC, DysL, SLI; DysL, SLI; DysC, SLI	Miller & McCardle	2011	21229298
DysC, DysL	Mitchell	2011	21296568
DysL, SLI	Newbury et al.	2014	24705331
DysL, SLI	Oswald et al.	2017	28798667
DysL, SLI	Ozernov-Palchik et al.	2016	27766284
DysL, lvPPA	Pan & Chen	2013	23597030
DysL, SLI	Paracchini et al.	2011	21894572
DysL, SLI	Peterson & Pennington	2012	22513218
DysL, SLI	Peterson & Pennington	2015	25594880
DysL, SLI	Poelmans et al.	2011	20956978
DysL, SLI	Pottier et al.	2016	27009575
DysL, SLI	Raskind et al.	2013	23308072
DysL, SLI	Rodenas-Cuadrado et al.	2014	23714751
DysL, lvPPA	Rohrer et al.	2010	19679189
DysL, lvPPA	Rohrer et al.	2010	19766663
DysL, SLI	Rudov et al.	2013	23949389
DysL, SLI	Scerri & Schulte-Körne	2010	20091194
DysC, DysL	Semrud-Clikeman & Bledsoe	2011	21701839
DysL, SLI	Skiba et al.	2011	21243420
DysL, SLI	Smith	2011	22113455
DysL, SLI	Smith et al.	2010	20814255
DysL, SLI	Zhong et al.	2013	23229871
Table sorted by author name (ascending) and publication year (ascending).

## Sheet: S7B
Table S7B. Literature evaluation - The 71 research articles providing the 77 candidate genes.
Author	Year	PMID	Study number
Adams et al.	2017	28866788	1
Anthoni et al.	2012	22426781	2
Bates et al.	2010	19901951	3
Bates et al.	2011	20949370	4
Bergeron et al.	2018	30255971	5
Buonincontri et al.	2011	20798984	6
Carrion-Castillo et al.	2017	28074887	7
Centanni et al.	2018	29894888	8
Cicchini et al.	2015	26019324	9
Cope et al.	2012	22750057	10
Couto et al.	2010	19588467	11
Czamara et al.	2011	21104116	12
Docherty et al.	2010	20602751	13
Doust et al.	2020	32248883	14
Eicher et al.	2013	23691092	15
Eicher et al.	2013	24024963	16
Eicher et al.	2014	24509779	17
Eicher et al.	2015	25778907	18
Einarsdottir et al.	2015	26400686	19
Elbert et al.	2011	21207242	20
Field et al.	2013	23190410	21
Gialluisi et al.	2014	25065397	22
Gialluisi et al.	2019	30741946	23
Gialluisi et al.	2020	33057169	24
Gori et al.	2015	25270309	25
Grimm et al.	2020	33172359	26
Kegel & Bus	2013	22897338	27
Kim et al.	2016	26791154	28
König et al.	2011	21184582	29
Lind et al.	2010	20068590	30
Luciano et al.	2011	21623652	31
Luciano et al.	2018	29959602	32
Ludwig et al.	2010	19591125	33
Ludwig et al.	2013	19591125	34
Männel et al.	2015	26283516	35
Marino et al.	2011	21046216	36
Marino et al.	2012	21881542	37
Marino et al.	2014	24926531	38
Martinelli et al.	2021	33864365	39
Mascheretti et al.	2013	23176554	40
Mascheretti et al.	2014	24430574	41
Mascheretti et al.	2015	25426763	42
Mascheretti et al.	2015	25916574	43
Matsson et al.	2011	21203819	44
Matsson et al.	2015	25877001	45
Mesulam et al.	2019	30896577	46
Mozzi et al.	2017	28436202	47
Mueller et al.	2014	24373531	48
Müller et al.	2017	29201552	49
Neef et al.	2017	28182973	50
Newbury et al.	2011	21165691	51
Pagnamenta et al.	2010	20346443	52
Paracchini et al.	2011	20846247	53
Perdue et al.	2019	30009840	54
Peter et al.	2011	21484596	55
Pettigrew et al.	2016	27307794	56
Powers et al.	2013	23746548	57
Powers et al.	2016	26660103	58
Riva et al.	2019	29803723	59
Roeske et al.	2011	19786962	60
Sánchez-Morán et al.	2018	30566519	61
Scerri et al.	2010	21060895	62
Scerri et al.	2011	21457949	63
Scerri et al.	2012	23209710	64
Simmons et al.	2010	20948219	65
Skeide et al.	2015	26080313	66
Tran et al.	2014	24612512	67
Truong et al.	2016	27535846	68
Ulfarsson et al.	2017	28440815	69
Wilcke et al.	2012	21897444	70
Zou et al.	2012	23065966	71
Table sorted by author name (ascending) and publication year (ascending).

## Sheet: S7C
Table S7C. Literature evaluation - The 77 candidate genes from the remaining 71 research articles.
Gene	Disorder(s)	Study number(s)
ACOT131	DysL	17
ANKK1	SLI	15,18
APOE	lvPPA	5
APP	lvPPA	5
ATP2C2	DysL & SLI	39,49,51
ATP7B	SLI	68
BDNF	SLI	17,65
C15orf15	DysL	3
C2ORF3	DysL	64
CCDC136	DysL & SLI	1,22
CEP63	DysL	19
CHRNA3	SLI	18
CMAHP	DysL & SLI	17
CMIP	DysL & SLI	32,51,63,64
CNTNAP2	DysL & SLI	16,32,51,55
CNTNAP5	DysL	52
COL4A2	DysL & SLI	16
CYFIP1	DysC & DysL	69
CYP19A1	DysL	2,32
DCDC2	DysC, DysL & SLI	1,9,10,12,16-18,25,29,30,32,36-38,45,50,51,57-59,63
DGKI	DysL	44
DIP2A	DysL	32
DNAAF42	DysC & DysL	3,32,36,40,43,49,53
DNAH5	DysC	13
DOCK4	DysL	52
DRD2	SLI	18
DRD4	DysL	27
DYM	DysL	62
FGF18	DysL	21
FLNC	DysL & SLI	1,22
FOXP2	DysL & SLI	14,16,47,55,61,70
GCFC2	DysL	32
GRIK1	DysC	13
GRIN2B	DysL	33,42,43
GRN	lvPPA	28,46
ITM2B	SLI	68
KIAA0319	DysL & SLI	1,7,8,10-12,16,17,20,29,32,43,50,51,57,58,61,63,71
KIAA0319L	DysL	32
LOC3887803	DysL	24
LPHN3	DysL	21
MAPT	lvPPA	5
MC5R	DysL	62
MIR924HG	DysL	23
MMP7	DysC	13
MRPL19	DysL	32,64
MSI2	DysL	21
MYO18B	DysC & DysL	34
MYO5B	DysL	48
NDST4	SLI	16
NEDD4L	DysL	48,62
NIPA1	DysC & DysL	69
NIPA2	DysC & DysL	69
NKAIN2	DysL	31
NKAIN3	DysL	23
NOP9	DysL & SLI	56
NRSN1	DysL	11
OPA3	DysL	16
PCDH8	SLI	68
PCNT	DysL	32
PDE7B	DysL	6
PRMT2	DysL	32
RAB27A	DysL	3
RBFOX2	DysL & SLI	22
RIPOR24	DysL & SLI	17
ROBO1	DysC, DysL & SLI	4,32,41,67
S100B	DysL	32,45
SETDB2	SLI	68
SETBP1	DysL	54
SLC2A3	DysL	60,66
SPRY1	DysL	26
TCF12	DysL	6
TDP25	DysL	10,11,17,42
TNFRSF1B	DysL	35
TUBGCP5	DysC & DysL	69
VEPH1	DysL	24
ZNF280D	DysL	6
ZNF385D	DysL & SLI	16
Footnotes:
1 Previous symbol THEM2
2 Previous symbol DYX1C1
3 uncharacterized gene
4 Previous symbol FAM65B
5 Previous symbol TTRAP

## Sheet: S7D
Table S7D. Literature evaluation - Basic annotation of the 21 phonology-related genes.
Gene1	Gene name	Cytogenetic band	HGNC ID2	ENTREZ ID3	ENSEMBL ID4	Disorders
ATP2C2	ATPase Secretory Pathway Ca2+ Transporting 2	16q24.1	29103	9914	ENSG00000064270	DysL & SLI
CCDC136	Coiled-Coil Domain Containing 136	7q32.1	22225	64753	ENSG00000128596	DysL & SLI
CMAHP	Cytidine Monophospho-N-Acetylneuraminic Acid Hydroxylase, Pseudogene	6p22.3	2098	8418	ENSG00000168405	DysL & SLI
CMIP	C-Maf Inducing Protein	16q23	24319	80790	ENSG00000153815	DysL & SLI
CNTNAP2	Contactin Associated Protein Like 2	7q35	13830	26047	ENSG00000174469	DysL & SLI
COL4A2	Collagen Type IV Alpha 2 Chain	13q34	2203	1284	ENSG00000134871	DysL & SLI
CYFIP1	Cytoplasmic FMR1 Interacting Protein 1	15q21	13759	23191	ENSG00000273749	DysC & DysL
DCDC2	Doublecortin Domain Containing 2	6p22.1	18141	51473	ENSG00000146038	DysC, DysL & SLI
DNAAF4	Dynein Axonemal Assembly Factor 4	15q21.3	21493	161582	ENSG00000256061	DysC & DysL
FLNC	Filamin C	7q32.1	3756	2318	ENSG00000128591	DysL & SLI
FOXP2	Forkhead Box P2	7q31	13875	93986	ENSG00000128573	DysL & SLI
KIAA0319	KIAA0319 Gene	6p22.3	21580	9856	ENSG00000137261	DysL & SLI
MYO18B	Myosin XVIIIB	22q12.1	18150	84700	ENSG00000133454	DysL & SLI
NIPA1	NIPA Magnesium Transporter 1	15q11.2	17043	123606	ENSG00000170113	DysC & DysL
NIPA2	NIPA Magnesium Transporter 2	15q11.2	17044	81614	ENSG00000140157	DysC & DysL
NOP9	NOP9 Nucleolar Protein	14q12	19826	161424	ENSG00000196943	DysC & DysL
RBFOX2	RNA Binding Fox-1 Homolog 2	22q12.3	9906	23543	ENSG00000100320	DysL & SLI
RIPOR2	RHO Family Interacting Cell Polarization Regulator 2	6p22.3	13872	9750	ENSG00000111913	DysL & SLI
ROBO1	Roundabout Guidance Receptor 1	3p12.3	10249	6091	ENSG00000169855	DysC, DysL & SLI
TUBGCP5	Tubulin Gamma Complex Associated Protein 5	15q11.2	18600	114791	ENSG00000275835	DysC & DysL
ZNF385D	Zinc Finger Protein 385D	3p24.3	26191	79750	ENSG00000151789	DysL & SLI
Footnotes:
1 Gene symbols from HGNC, an online database from the Human Genome Organisation (HUGO).
2 Identifier (ID) from HGNC for genes with an approved gene symbol.
3 Identifier (ID) from ENTREZ, an online cross-database search system from the National Center for Biotechnology Information (NCBI), USA.
4 Identifier (ID) from ENSEMBL, the European equivalent to ENTREZ from the European Bioinformatics Institute and the Wellcome Trust Sanger Institute.

## Sheet: S7E
Table S7E. Literature evaluation - The genetic items extracted from the 21 phonology-related genes.
Reported gene	Reported genetic marker	LD between reported markers1	Reported p-value of significant marker	Disorder (global)	Disorder (specific)	Sample size	Ethnicity	Study type	Study number
ATP2C2	chr16:84405221 missense variant	.	p = 0.002 for non-word reading	DysL & SLI	LI: Reading measures (READ, SPELL, PHONEME, NW_READ, VIQ, PIQ)	2046 cases (SLI, dyslexia); 84445 controls	European	Candidate Gene Study	39
ATP2C2	rs8053211; rs2875891; rs16973771	rs2875891-rs16973771	rs8053211 (p = 0.0039); rs2875891 (p = 0.0146); rs16973771 (p = 0.0199)	DysL	DysL-related Missmatch Response	67 children	German	Candidate Gene Study	49
ATP2C2	rs2875891; rs8045507; rs8053211; rs11860694; rs16973771	rs2875891-rs8045507; rs2875891-rs16973771; rs8045507-rs16973771; rs8053211-rs11860694	rs2875891 (NWR p = 0.0027); rs8045507 (ELS p = 0.0317; NWR p = 0.0028); rs8053211(ELS p = 0.0088; NWRP = 0.0004); rs11860694 (ELS p = 0.0025; RLS p = 0.0381; NWR p = 0.0003); rs16973771 (ELS p = 0.0363; NWR p = 0.0011)	SLI	SLI families: Measures of language ability (ELS, RLS, and NWR)	780 individuals from 181 2-generation families (SLI cohort, SLI Consortium)	European	Candidate Gene Study	51
CCDC136	rs142055253; rs143537881; rs185493260; 7:128446877 (frameshift)	.	Enrichment analyses Two-tailed Fisher’s exact test P = 0.0098 (locus CCDC136/FLNC)	DysL	RD: Reading performance	96 affected, unrelated subjects; 503 European subjects from the 1000 Genomes Project	European American + European	Linkage and Association Analyses	1
CCDC136	7:128439695:I; rs3800560; rs58845495 (intergenic); rs59197085 (CCDC136-FLNC)	rs3800560-rs58845495; rs3800560-rs59197085; rs58845495-rs59197085	7:128439695:I (p adjusted = 4.48×10–7); rs3800560 (p adjusted = 3.95×10–7); rs58845495 (p adjusted = 3.23×10–7); rs59197085 (p adjusted = 3.01×10–7)	DysL & SLI	Reading and language abilities: Reading and language traits (considered traits WRead, Wspell, PD, PA, OC, vIQ, and pIQ)	983 participants from 608 independent nuclear families (UK Reading Disability, UK-RD); 548 participants from 298 independent nuclear families (SLI Consortium, SLIC); 749 participants from 343 unrelated twinships/sibships (Colorado Learning Disabilities Research Centre, CLDRC); 6434 participants from the general population	United Kingdom + USA	GWAS	22
CMAHP	rs1562422	.	p = 0.00081	DysL & SLI	RD and LI (moderate RD); linguistic traits => association of DYX2 locus with RD, LI, and verbal IQ	5,579 individuals for language-related analyses and 5,525 individuals for reading-related analyses (Avon Longitudinal Study of Parents and Children, ASPAC); Replication cohorts: Iowa LI 428 Subjects, Colorado RD 1188 Subjects, Italy RD 878 Subjects	European + USA	Candidate Gene Study	17
CMIP	rs3935802; rs6564903; rs7201632; rs12927866; rs4265801	rs3935802-rs7201632; rs3935802-2654915012; rs6564903-2654915012; rs7201632-2654915012	rs3935802 (Read p = 0.0025; Spell p = 0.0277; ELS p = 0.0285; RLS p = 0.0033; NWR p = 0.0079); rs6564903 (Read p = 0.0002; Spell p = 0.0079; ELS p = 0.0110; RLS p = 0.0012; NWR p = 0.0007); rs7201632 (Read p = 0.0047; Spell p = 0.0137; RLS p = 0.0021; NWR pP = 0.0157); rs12927866 (Read p = 0.0046; Spell p = 0.024; ELS p = 0.0451; RLS p = 0.0027; NWR p = 0.0113)	SLI	SLI families/population: Multiple language measures; reading- and language-related traits	780 individuals from 181 2-generation families (SLI cohort, SLI Consortium)	European	Candidate Gene Study	51
CMIP	rs4265801, rs6564903, rs12927866, rs16955705	rs6564903-rs12927866; rs12927866-rs16955705	rs12927866 (p = 0.005); rs6564903 (p = 0.002); rs16955705 (p = 0.029) with reading	DysL & SLI	Reading skills across the ability range/reading abilities of the general population (possible influence of the same CMIP variants on both reading and language problems in depencence of other risk factors); SLI cohort: Association with nonword repition	Avon Longitudinal Study of Parents and Children / ALSPAC cohort (n=3725)	European	Candidate Gene Study	63
CNTNAP2	rs6951437	.	p = 0.0000462	SLI	LI (definition with language measures phoneme deletion age 7 years, verbal comprehension age 8 years, and nonword repetition age 8 years)	527 subjects defined as RD cases; 337 subjects defined as LI cases; 174 individuals affected with both RD and LI (ALSPAC cohort); 440 individuals for replication (PING study)	European	GWAS (candidate gene lookup)	16
CNTNAP2	rs2710102; rs2710117; rs7794745; rs10246256; rs17236239	rs2710117-rs10246256	rs2710102 (Read p = 0.0354; Spell p = 0.0089; ELS p = 0.02; RLS p = 0.0312; NWR p = 0.0005); rs2710117 (Read p = 0.0205; Comp p = 0.0067; Spell p = 0.0051; ELS p = 0.0189; RLS p = 0.0056; NWR p = 0.001); rs10246256 (Read p = 0.0003; Comp p = 0.0016; Spell p = 0.0002; ELS p = 0.0062; RLS p = 0.0032; NWR p = 0.0008); rs17236239 (Read p = 0.0272; Spell p = 0.0086; ELS p = 0.0071; RLS p = 0.0336; NWR…	SLI	SLI families: Reading-related measures	780 individuals from 181 2-generation families (SLI cohort, SLI Consortium)	European	Candidate Gene Study	51
CNTNAP2	rs851715; rs17236239; rs2710102; rs4431523	.	rs2710102 (p = 0.0174) {NWR}; replicated	DysL	DysL family sample: Nonword repetition	103 probands for NWR; 102 probands for SR; 188 probands for RWRE; 188 probands for WATT; 103 probands for RAPA; 101 probands for FS-D	European American	Linkage Analysis	55
COL4A2	rs1983931; rs9521789	rs1983931-rs9521789	rs1983931 (p = 1.06*10-6); rs9521789 (P = 7.59*10-7); not replicated	DysL & SLI	Comorbid RD (definition with phoneme deletion age 7 years, single-word reading age 7 years, single-word reading age 9 years, nonword reading age 9 years, and reading comprehension age 9 years) and LI (definition with language measures phoneme deletion age 7 years, verbal comprehension age 8 years, and nonword repetition age 8 years)	527 subjects defined as RD cases; 337 subjects defined as LI cases; 174 individuals affected with both RD and LI (ALSPAC cohort); 440 individuals for replication (PING study)	European	GWAS	16
CYFIP1	15q11.2 BP1–BP2 deletion	.	p = 1.4x10− 4; CNV (deletion)	DysC & DysL	Cognitive, structural, and functional correlates of DysL and DysC (combined phenotype)	71 subjects carrying the 15q11.2(BP1–BP2) deletion in the absence of a schizophrenia, bipolar disorder, autism or intellectual disability diagnosis; 643 controls not carrying CNVs associated with psychiatric disorders	Icelandic population	Candidate Gene Study	69
DCDC2	rs145154884; rs766600237	.	Enrichment analyses Two-tailed Fisher’s exact test p = 0.012 (locus DYX2)	DysL	RD: Reading performance	96 affected, unrelated subjects; 503 European subjects from the 1000 Genomes Project	European + European American	Linkage and Association Analyses	1
DCDC2	Deletion intron 2	.	.	DysL	DysL: Strong motion deficits, particularly strong at high spatial frequencies; loss of visual motion discrimination	21 dyslexic subjects; 8 controls	Italian	Candidate Gene Study	9
DCDC2	BV677278 (Intron 2 deletion); rs793862; rs807701; rs807724; rs1087266	.	BV677278 (p = 0.00003); rs793862 (P = 0.0065 PC; p = 0.0074 PC); rs807701 (p = 0.035/0.0411 cognitive measures); rs807724 (p = 0.0221 cognitive measures); rs1087266 (p = 0.008 AC; p = 0.0038 NWR) -> replicated	DysL	Subjects with RD: Altered brain activation in reading-related brain regions; reading performance; brain activation patterns during imaging-reading tasks (strongest association between activation of the left anterior inferior parietal lobe and BV677278 in DCDC2)	82 unrelated subjects of European American ancestry (50 RD cases / 25 nonimpaired controls / 7 with unknown affectation status)	European American	Linkage Analysis	10
DCDC2	1000 Genomes: Chr6:24459391, additionally chr6:24564881, chr6:24571041, chr6:24581378	.	Chr6:24459391 (p = 0.0000628, genotyped) -> Data imputed (p = 3.69E-04)	DysL	Mismatch negativity, late mismatch negativity component	Sample of 200 dyslexic German children (150 male and 50 female)	European	Candidate Gene Study	12
DCDC2	rs793834	.	p = 0.0002679	SLI	LI (definition with language measures phoneme deletion age 7 years, verbal comprehension age 8 years, and nonword repetition age 8 years)	527 subjects defined as RD cases; 337 subjects defined as LI cases; 174 individuals affected with both RD and LI (ALSPAC cohort); 440 individuals for replication (PING study)	European	GWAS (candidate gene lookup)	16
DCDC2	rs707864; rs807694; rs9379651; rs10456301; rs16889066; rs33914824 -> haplotype of 6 marker	.	rs707864 (p = 0.017); rs807694 (p = 0.028); rs33914824 (p = 0.034) -> replication	DysL & SLI	RD and LI => association of DYX2 locus with RD, LI, and verbal IQ	5,579 individuals for language-related analyses and 5,525 individuals for reading-related analyses (Avon Longitudinal Study of Parents and Children, ASPAC); Replication cohorts: Iowa LI 428 Subjects, Colorado RD 1188 Subjects, Italy RD 878 Subjects	European	Candidate Gene Study	17
DCDC2	rs3789221; rs6456596; rs7764902; rs9379651; rs9460973; rs9467062; rs12192947	rs6456596-rs7764902; rs6456596-rs9460973; rs6456596-rs9467062; rs7764902-rs9460973; rs7764902-rs9467062; rs9460973-rs9467062	DCDC2 (p = 1.43x10–4)	SLI	Moderate or severe speech sound disorder and related neurocognitive domains: Wide array of neurocognitive and language measures; phonological awareness	Cleveland SSD (210 affected and 257 unaffected individuals in 127 families); Denver SSD (113 affected individuals and 106 unaffected individuals in 85 families)	USA, self-reported Caucasian	Candidate Gene Study	18
DCDC2	Deletion Intron 2	.	p < 0.05	DysL	Children with DD and DCDC2d: Illusory visual motion perception	Study 1 => Eleven children with DD and 19 controls; Study 2 => 9 children with a DMX-IV diagnosis of DD; Study 3 => 23 subjects, 11 NR+ and 12 NR-	Italian	Candidate Gene Study	25
DCDC2	D6S1279; D6S422; D6S1660; D6S273; D6S1575; D6S459 (microsatelites at DYX2)	.	p = 1.00x10-7	DysL	DysL and related cognitive traits: Cognitive trait rapid naming (objects/colors)	1,030 individuals from 246 dyslexia families	German	Linkage Analysis	29
DCDC2	rs793687 (GPLD1); rs793834; rs793842; rs793862; rs807685; rs807724; rs870601; rs1087266; rs1091047; rs1419228; rs1535331; rs1770909; rs2753912; rs2792682; rs3765502; rs6922023; rs7765678; rs9460976; rs9467075; rs9467076; rs10498720	rs807724-rs2792682; rs9467076-rs9460976	rs1091047 (p = 0.0076); rs1419228 (p = 0.0016); rs6922023 (p = 0.046); rs7765678 (p = 0.044); rs9467075 (p = 0.036); rs9467076 (p = 0.035)	DysL	Reading and spelling: Normal variation; risk gene for RD; regular-word reading/spelling and irregular-word reading (rs1419228); irregular-word reading, a measure of lexical storage (rs1091047); reading and spelling (rs9467075, rs9467076, rs7765678, and rs6922023 => nominal significant)	522 families of adolescent twins unselected for reading impairment	Australia, Caucasian (98% Caucasian and predominantly of Anglo-Celtic (82%))	Candidate Gene Study	30
DCDC2	intron 2 deletion; BV677278 (compound short tandem repeat)	.	p = 0.02 (DysC)	DysC & DysL	Nuclear families of DD: Language and mathematics traits (‘Numerical Facts’)	180 nuclear families, including 28 parent-child pairs, 94 triads, 48 families with two, 9 with three, and 1 with four offspring, yielding a total of 581 participants	Italian	Candidate Gene Study	36
DCDC2	rs793862; BV677278	.	BV677278 (p = 0.048 WR, p = 0.00001 MEMO)	DysL	Susceptibility to DD; association between reading skills and the BV677278 deletion and between memory and BV677278 allele 10	303 unrelated nuclear families with 404 offspring; except for 37 families that had only one parent available, all parents were represented, yielding a total sample of 973 subjects	Italian	Candidate Gene Study	37
DCDC2	deletion in DCDC2/intron 2	.	.	DysL	Subjects with DysL and DCDC2d: WM disorganization, reduced fractional anisotropy, mainly in the left hemisphere and in the corpus callosum	Total sample n = 47; DYS+ n = 11; DYS- n = 10; NR+ n = 10; NR- n = 16	Italian	Candidate Gene Study	38
DCDC2	rs2274305; rs6937665	.	rs2274305 (corrected p = 0.002) in German families	DysL	DD: Spelling performance (role in the biology of reading and spelling)	100 DD cases (discovery) + 159 case-control Finland+ 363 Extended case-control Finland + 414 Finnish families+ 1048 German families = 2048 probands	European	Candidate Gene Study	45
DCDC2	rs793842; rs807701; rs807724; rs1087266; rs1091047; rs6922023	.	p = 0.004 reading speed; p = 0.008 reading comprehension	DysL	Response consistency of speech-evoked brainstem responses to acoustically presented syllables => trend towards more stable responses	159 native German-speaking children were enrolled, consisting of 95 preliterate children	German	Candidate Gene Study	50
DCDC2	rs793862; rs807701; rs807724; rs1087266	.	rs807724 (P = 0.027; 0.036); rs807701 (p = 0.028) in dyslexia probands	DysL	DysL (susceptibility)	780 individuals from 181 2-generation families (SLI cohort, SLI Consortium); 264 unrelated nuclear families (a total of 634 siblings; dyslexia cohort)	European	Candidate Gene Study	51
DCDC2	microdeletion (BV677278)	.	p = 6.068x10-5 for DysL and 2.84x10-4 for SLI	DysL & SLI	Risk of reading impairment and LI; acquisition and utilization of reading and verbal language skills; reading and language skills; reading and cognitive phenotypes	359 cases and 10465 children (ALSPAC cohort)	European	Linkage Analysis	57
DCDC2	READ1	.	Allele 5 (p = 0.0025926 DysL); Alleles 5 and 6 (p = 0.0015725 DysL, p = 0.0003556 SLI); Clade 1 (p = 0.0020036 DysL, p = 0.00007402 SLI)	DysL & SLI	Learning disabilities RD and LI (interactions between READ1 and KIAHap => effect on performance on measures of reading, language, and IQ)	359 cases and 10465 children (ALSPAC cohort); CLDRC cohort (1,201 European-American individuals in 293 nuclear families)	European + European American	Linkage Analysis	58
DCDC2	BV677278 (READ1)	.	p = 0.002 reading	DysL	Phenotypic variability in reading (dis)ability (i.e., reading accuracy and speed)	1991 individuals	Italian	Candidate gene study	59
DCDC2	rs793862; rs807701; rs807724; rs1087266	.	rs793862 (p = 0.005); rs807701 (p = 0.018); rs807724 (p = 0.003) {replication with RD and Comorbid Cases}	DysL	Specific cognitive traits/cognition: Reading-related traits, RD	Avon Longitudinal Study of Parents and Children / ALSPAC cohort (n=3725)	European	Candidate Gene Study	63
DNAAF4	rs622097; rs685935; rs692690; rs3743204; rs3743205; rs6493791; rs7181999; rs8040756; rs8043049; rs12324434; rs17819126; rs61761345	rs685935-rs6493791	rs685935 (p = 0.04, Short-term memory); rs17819126 (p = 0.0199 and 0.0003 Reading, p = 0.0086 Spelling); rs3743204 (p = 0.0089 Reading) -> replication of other studies	DysL	Deficits in reading and spelling; reading and spelling ability => reading measures and spelling of lexical processing words (rs17819126); irregular and nonword reading (rs3743204); verbal short-term memory (rs685935)	284 dizygotic twin pairs; 164 dizygotic families with at least one additional non-twin sibling (203 siblings); 143 monozygotic twin families (74 with an additional sibling and 13 with two siblings); 56 (non-twin) sibling pairings, 9 trios and 1 quadruplet pairing (these included cases of unpaired twins with a sibling), with a further 133 unpaired twins/sibling	Australia, Caucasian	Linkage Analysis	3
DNAAF4	gene-based association signal (Magma software)	.	p = 0.009	DysL	Reading-related skills (performance on phonological working memory or non-alphabetic items (CTOPP-MD))	1365 individuals	English	Candidate Gene Study	32
DNAAF4	DYX1C1-3G/A marker; -1249 G/T marker; -1259CT marker	.	DYX1C1-3G/A marker (p = 0.05); -1249GT marker (p = 0.02) {DysC}	DysC & DysL	Nuclear families of DD: Language and mathematics traits (‘Mental Calculation’)	180 nuclear families, including 28 parent-child pairs, 94 triads, 48 families with two, 9 with three, and 1 with four offspring, yielding a total of 581 participants	Italian	Candidate Gene Study	36
DNAAF4	DYX1C1-1259C/G marker; -3G/A; -1249 G/T	.	.	DysL	DD and reading-related neuropsychological phenotypes => gene-by-environment interactions (diathesis-stress model for both reading and memory composites)	Sample of 451 nuclear families with DNA available, 342 of whom with complete neuropsychological information; sib-pair study => participation of 168 families with >1 children and complete neuropsychological information	Italian	Interaction Analysis	40
DNAAF4	DYX1C1-1259C/G marker; -3G/A; -1249 G/T	.	Interception of DYX1C1—rs1259C/G with GRIN2B—rs2268119A/T (p = 0.001)	DysL	Etiology of DD	804 offspring belonging to 493 unrelated Italian nuclear families of probands with DD	Italian	Interaction Analysis	43
DNAAF4	rs17819126; rs3743204	.	rs17819126 (p=0.037); rs3743204 (p = 0.0157)	DysL	DysL-related Mismatch Response	67 children	German	Candidate Gene Study	49
DNAAF4	rs600753; rs622097; rs685935; rs687623; rs692646; rs692690; rs692691; rs2290981; rs3743204; rs3743205; rs3759864; rs4144134; rs4774768; rs6493791; rs7174102; rs7181226; rs7181999; rs7182524; rs8034029; rs8037376; rs8040756; rs8043049; rs12324434; rs12594039; rs12594443; rs16976343; rs16976349; rs16976351; rs17819126	rs600753-rs685935; rs600753-rs4144134; rs600753-rs4774768; rs685935-rs4144134; rs685935-rs6493791; rs687623-rs692646; rs687623-rs692691; rs692646-rs692690; rs692646-rs692691; rs692690-rs692691; rs2290981-rs3759864; rs2290981-rs7182524; rs2290981-rs12594039; rs2290981-rs12594443; rs2290981-rs16976349; rs3743205-rs16976351; rs3759864-rs7182524; rs3759864-rs12594039; rs3759864-rs12594443; rs3759864-…	rs7174102 (p = 0.036 Spelling); rs8037376 (p = 0.027 Spelling); rs8040756 (p = 0.026 Reading); rs8043049 (P = 0.012 Spelling)	DysL	Reading and spelling measures; association signals with reading and spelling tests => role of DNAAF4 in contributing to DysL and reading abilities	520 individuals	Australia, Caucasian	Candidate Gene Study	53
FLNC	rs34972246; rs146953558; rs181067717; rs189525930; rs202223616; rs374983276; rs768103657	.	Enrichment analyses Two-tailed Fisher’s exact test p = 0.0098 (locus CCDC136/FLNC)	DysL	RD: Reading performance	96 affected, unrelated subjects; 503 European subjects from the 1000 Genomes Project	European + European American	Linkage and Association Analyses	1
FLNC	rs3734972	.	rs3734972 p adjusted = 4.68×10–7	DysL & SLI	Reading and language abilities: Reading and language traits (considered traits WRead, Wspell, PD, PA, OC, vIQ, and pIQ)	983 participants from 608 independent nuclear families (UK Reading Disability, UK-RD); 548 participants from 298 independent nuclear families (SLI Consortium, SLIC); 749 participants from 343 unrelated twinships/sibships (Colorado Learning Disabilities Research Centre, CLDRC); 6434 participants from the general population	European + European American	GWAS	22
FOXP2	rs10230558; rs12533005; rs2253478; rs6980093; rs7782412; rs923875; rs936146; in supplement reported SNPs	rs12533005<>rs6980093	Phonetic spelling (p = 0.002), Reading and spelling PC (P= < 0.001); Nonword repetition (p < 0.001)	DysL & SLI	Reading and language abilities in adults: Nonword repetition, phonetic spelling, reading and spelling composite score	1550 participants	Australia, Caucasian	Association Analyses	14
FOXP2	rs1530680 (intergenic)	.	p = 0.0001702	DysL & SLI	Comorbid RD (definition with phoneme deletion age 7 years, single-word reading age 7 years, single-word reading age 9 years, nonword reading age 9 years, and reading comprehension age 9 years) and LI (definition with language measures phoneme deletion age 7 years, verbal comprehension age 8 years, and nonword repetition age 8 years)	527 subjects defined as RD cases; 337 subjects defined as LI cases; 174 individuals affected with both RD and LI (ALSPAC cohort); 440 individuals for replication (PING study)	European + European American	GWAS	16
FOXP2	rs6980093	.	p < 0.001	DysL	Language and reading (dis)abilities; language-based learning (dis)abilities; rs6980093 variant: Modulation of both language- and reading-related traits (i.e., FLUENCY and SWRacc)	population based cohort: 699 children; DD sample: 572 children from 317 families	European	Candidate Gene Study	47
FOXP2	rs923875; rs936146; rs2035980 (PPP1R3A); rs7782412; rs10230558; rs12154391; rs12533005	rs936146-rs12154391	rs7782412 (p = 0.0174) {NWR}; replicated	DysL	DysL family sample: Timed reading and motor activities (NWR, RWRE, RAPA, and FS-D)	527 subjects defined as RD cases; 337 subjects defined as LI cases; 174 individuals affected with both RD and LI (ALSPAC cohort)	European American	Linkage Analysis	55
FOXP2	rs12533005	.	p = 0.0079 dyslexia controls	DysL	Dyslexia: Verbal and Numerical-Stroop tasks	4678 individuals	Spanish	Candidate gene study	61
FOXP2	rs4727799; rs7782412; rs12533005; rs17137124; rs10228350; rs10268637	rs10228350-rs10268637	rs12533005 (p = 0.016) with dyslexia	DysL	fMRI => significant main effect for the factor ‘genetic risk’ in a temporo-parietal area involved in phonological processing (written and spoken language); significant interaction effect between the factors ‘disorder’ and ‘genetic risk’ in activation of inferior frontal brain areas	61 dyslexics of German origin and 184 healthy, ethnically matched blood donors as controls	German	Candidate Gene Study	70
KIAA0319	rs113411083; rs148566925; rs201302072; rs773691612	.	Enrichment analyses Two-tailed Fisher’s exact test p = 0.012 (locus DYX2)	DysL	RD: Reading performance	96 affected, unrelated subjects; 503 European subjects from the 1000 Genomes Project	European + European American	Linkage and Association Analyses	1
KIAA0319	rs761100; rs2038137; rs4504469; rs6935076; rs9467247 (intergenic)	.	rs761100 (p = 0.009); rs2038137 (p = 0.011)	DysL	Rapid naming	185 children with both behavioral measurements and available DNA, from 180 unrelated families; 64 controls	Dutch	Candidate Gene Study	7
KIAA0319	rs6935076; rs761100	.	rs6945076 (p = 0.03); rs761100 (p = 0.62)	DysL	Dyslexia: Degree of neural variability in primary auditory cortex (magnetoencephalography)	children with (N=20) and without dyslexia (N=12)	American	Candidate gene study	8
KIAA0319	rs6935076	.	rs6935076 (p = 0.049) -> replicated	DysL	Subjects with RD: Altered brain activation in reading-related brain regions; reading performance; brain activation patterns during imaging-reading tasks	82 unrelated subjects of European American ancestry (50 RD cases / 25 nonimpaired controls / 7 with unknown affectation status)	European American	Linkage Analysis	10
KIAA0319	rs793663 (intergenic); rs807530; rs2038137; rs2038138; rs2038139; rs2235676; rs2817200; rs4504469; rs6935076; rs9467247 (intergenic); rs12193738	rs2038137-rs2038138; rs2038137-rs2038139; rs2038138-rs2038139; rs2817200-rs4504469	rs6935076 (p = 0.014)	DysL	RD (diagnosed with TTI, WRAT-3, WRMT-R, and TOWRE)	112 siblings	European ancestry in Canada	Linkage Analysis	11
KIAA0319	region between DCDC2 and KIAA0319: chr6:24564881, chr6:24571041, chr6:24581378 (1000 Genomes ID)	.	chr6:24564881 (p = 1.40e-05 genotyped, p = 6.63e-05 imputed); chr6:24571041 (p = 4.55e-06 imputed); chr6:24581378 (p = 1.40e-05 genotyped, p = 9.81e-07 imputed)	DysL	Mismatch negativity, late mismatch negativity component	Sample of 200 dyslexic German children (150 male and 50 female)	Northern and Western European ancestry	Candidate Gene Study	12
KIAA0319	rs16889556	.	p = 0.0005177	DysL & SLI	Comorbid RD (definition with phoneme deletion age 7 years, single-word reading age 7 years, single-word reading age 9 years, nonword reading age 9 years, and reading comprehension age 9 years) and LI (definition with language measures phoneme deletion age 7 years, verbal comprehension age 8 years, and nonword repetition age 8 years)	527 subjects defined as RD cases; 337 subjects defined as LI cases; 174 individuals affected with both RD and LI (ALSPAC cohort); 440 individuals for replication (PING study)	European	GWAS (candidate gene lookup)	16
KIAA0319	rs1883593 (intergenic); rs2817201; rs3212236 (intergenic); rs3756821; rs4576240; rs6456621; rs7763790; rs9295626; rs9356939; rs10456309 (replicated); rs17307478	.	In replication results: rs1883593 (p = 0.0052); rs4576240 (p = 0.0027); rs6456621 (p = 0.019); rs9295626 (p = 0.0055); rs9356939 (p = 0.018); rs10456309 (p = 0.073 and 0.0133)	DysL & SLI	RD and LI (severe RD); verbal IQ associations => association of DYX2 locus with RD, LI, and verbal IQ	5,579 individuals for language-related analyses and 5,525 individuals for reading-related analyses (Avon Longitudinal Study of Parents and Children, ASPAC); Replication cohorts: Iowa LI 428 Subjects, Colorado RD 1188 Subjects, Italy RD 878 Subjects	European + European American	Candidate Gene Study	17
KIAA0319	rs1883592 (intergenic); rs1883593 (intergenic); rs1883594 (intergenic); rs2038135; rs2038136; rs2038137; rs2235676; rs2235677; rs3756821 (regulatory region); rs6456625 (TF binding site); rs9467247 (intergenic); rs13220596; rs35853270 (intergenic); rs35882364; rs62400773; rs71815143 (upstream gene variant); microsatellite marker JA04; 24754493 (new SNP)	rs1883592-rs1883594; rs1883592-rs2038135; rs1883592- rs2038136; rs1883592-rs2038137; rs1883592-rs2235677; rs1883592-rs6456625; rs1883592-rs35853270; rs1883594-rs2038135; rs1883594-rs2038136; rs1883594-rs2038137; rs1883594-rs2235677; rs1883594-rs6456625; rs1883594-rs35853270; rs2038135-rs2038136; rs2038135-rs2038137; rs2038135-rs2235677; rs2038135-rs6456625; rs2038135-rs35853270; rs2038136-rs20381…	haplotype with JA04 and rs71815143; Global p = 0.0001	DysL	DysL/RD	Of the 352 families recruited to the study, 156 probands and 25 siblings met these criteria and were used in the analyses described in this study.	Canada (68.1% European)	Candidate Gene Study	20
KIAA0319	Microsatelites near to DYX2: D6S1279; D6S422; D6S1660; D6S273; D6S1575; D6S459	.	p = 1.00x10-7	DysL	DysL and related cognitive traits: Cognitive trait rapid naming (objects/colors)	1,030 individuals from 246 dyslexia families	German	Linkage Analysis	29
KIAA0319	rs2038137; rs2143340 (TDP2); rs4504469; rs9461045 (intergenic)	.	Interception of KIAA0319—rs9461045C/T with GRIN2B—rs11609779C/T (p = 0.001 ig family-based)	DysL	Etiology of DD	804 offspring belonging to 493 unrelated Italian nuclear families of probands with DD	Italian	Interaction Analysis	43
KIAA0319	rs761100; rs2179515; rs6935076	.	p = 0.004 writing and spelling	DysL	Genotypes carrying a higher amount of KIAA0319 risk alleles: Response consistency of speech-evoked brainstem responses to acoustically presented syllables => unstable representation of sound and reduced neural discrimination ability of stop consonants	159 native German-speaking children were enrolled, consisting of 95 preliterate children	German	Candidate Gene Study	50
KIAA0319	rs761100; rs2143340 (TD2); rs4504469; rs3212236 (intergenic); rs6935076; rs9461045 (intergenic)	rs3212236-rs9461045	rs761100 (SLI ELS p = 0.0349); rs2143340 (SLI Read p = 0.0130; Comp p = 0.0188; RLS p = 0.0084; DysL OC-choice p = 0.0403); rs4504469 (DysL OC-irreg p = 0.0174); rs3212236 (SLI Read p = 0.0223, Spell p = 0.0495, RLS p = 0.0038); rs6935076 (SLI ELS p = 0.0073); rs9461045 (DysL SPELL p = 0.0256, OC-irreg pP = 0.0254, OC-choice p = 0.0307)	DysL & SLI	Oral language ability	780 individuals from 181 2-generation families (SLI cohort, SLI Consortium); 264 unrelated nuclear families (a total of 634 siblings; dyslexia cohort)	European	Candidate Gene Study	51
KIAA0319	KIAHap	.	.	DysL	Association with RD	359 cases and 10465 children (ALSPAC cohort)	European + European American	Linkage Analysis	57
KIAA0319	KIAHap	.	.	DysL & SLI	Learning disabilities RD and LI (interactions between READ1 and KIAHap => effect on performance on measures of reading, language, and IQ)	359 cases and 10465 children (ALSPAC cohort); CLDRC cohort (1,201 European-American individuals in 293 nuclear families)	European + European American	Linkage Analysis	58
KIAA0319	rs4504469	.	p = 0.0025 dyslexia controls	DysL	Dyslexia: Word reading, RAN, syllable discrimination and Numerical Stroop	4678 individuals	Spanish	Candidate gene study	61
KIAA0319	rs761100; rs2038137; rs2143340 (TDP2); rs6935076; rs9461045	.	rs6935076 (p = 0.011); rs9461045 (p = 0.035) {replication with RD and Comorbid Cases}	DysL	Specific cognitive traits/cognition: Reading-related traits, RD	Avon Longitudinal Study of Parents and Children / ALSPAC cohort (n=3725)	European	Candidate Gene Study	63
KIAA0319	931C>T	.	931C>T (p = 0.007 case-control study)	DysL	Risk of DysL	106/194+148+57/96+247+350/273+191+52/51+156+188/363+331+363 case/control families	Finland, Canada, Italia, UK, USA, India	Candidate Gene Study	71
MYO18B	rs133885	.	rs133885 (p = 2.75x10-9, German sample combined)	DysC & DysL	Children with DysL/mathematical disability: Mathematical abilities; rs133885 genome-wide significant marker for mathematical abilities (carriers of the MYO18B risk-genotype: Significantly lower depth of the right intraparietal sulcus)	Individuals with dyslexia => German sample => 386 children; German Austrian replication-2 sample => 206 German and 118 Austrian children; Non-affected samples (German-Austrian control sample) => 214 German and 207 Austrian controls; Twin Early Development Study (TEDS) sample => 356 individuals	German sample	GWAS	34
NIPA1	15q11.2(BP1–BP2) deletion	.	p = 1.4x10− 4; CNV (deletion)	DysC & DysL	Cognitive, structural, and functional correlates of DysL and DysC (combined phenotype)	71 subjects carrying the 15q11.2(BP1–BP2) deletion in the absence of a schizophrenia, bipolar disorder, autism or intellectual disability diagnosis; 643 controls not carrying CNVs associated with psychiatric disorders	Icelandic population	Candidate Gene Study	69
NIPA2	15q11.2(BP1–BP2) deletion	.	p = 1.4x10− 4; CNV (deletion)	DysC & DysL	Cognitive, structural, and functional correlates of DysL and DysC (combined phenotype)	71 subjects carrying the 15q11.2(BP1–BP2) deletion in the absence of a schizophrenia, bipolar disorder, autism or intellectual disability diagnosis; 643 controls not carrying CNVs associated with psychiatric disorders	Icelandic population	Candidate Gene Study	69
NOP9	rs4280164	.	rs4280164 (p = 0.003 language and p = 0.045 reading in York study; p = 0.03 reading Dyslexia cohort)	DysL & SLI	Language-related phenotypes: Phonological awareness (paternal effect in the first cohort) and irregular word reading (maternal effect in the second cohort)	106 informative families characterised with reading and language measures => children with history of dyslexia (n=46); children with preschool speech and/or language difficulties (n = 26); typically developing children (n = 41) [DNA from additional family members generated a total sample size of 332 individuals]	European	Candidate Gene Study	56
RBFOX2	rs5750202; rs5750203; rs5755979; rs5995177; rs12158565	rs5750202-rs5750203; rs5750202-rs5755979; rs5750202-rs12158565; rs5750203-rs5755979; rs5750203-rs12158565; rs5755979-rs12158565	rs5750202 (p = 9.06×10–7); rs5750203 (p = 9.72×10–7); rs5755979 (p = 9.05×10–7); rs5995177 (p adjusted = 1.5×10–5), rs12158565 (p = 7.57×10–7)	DysL & SLI	Reading and language abilities: Reading and language traits (considered traits WRead, Wspell, PD, PA, OC, vIQ, and pIQ)	983 participants from 608 independent nuclear families (UK Reading Disability, UK-RD); 548 participants from 298 independent nuclear families (SLI Consortium, SLIC); 749 participants from 343 unrelated twinships/sibships (Colorado Learning Disabilities Research Centre, CLDRC); 6434 participants from the general population	European + European American	GWAS	22
RIPOR2	rs9348646	.	p = 0.00051	DysL & SLI	Verbal IQ associations; linguistic traits => association of DYX2 locus with RD, LI, and verbal IQ	5,579 individuals for language-related analyses and 5,525 individuals for reading-related analyses (Avon Longitudinal Study of Parents and Children, ASPAC)	European	Candidate Gene Study	17
ROBO1	rs162870; rs328049; rs333491; rs723766; rs1025946; rs1387665; rs1447833; rs1489848; rs1865862; rs1995402; rs2304503; rs2608021; rs4130991; rs4264688; rs4535189; rs4564923; rs4680960; rs6548621; rs6548628; rs6548651; rs6802848; rs6803202; rs7356113; rs7429525; rs7431092; rs7612183; rs7614913; rs7622444; rs7623728; rs7628757; rs7629503; rs7637338; rs7644521; rs7653197; rs9309819; rs9309828; rs98495…	rs162870-rs9309819; rs1387665-rs4535189; rs1387665-rs6548621; rs1387665-rs6548628; rs1387665-rs6803202; rs1995402-rs7431092; rs1995402-rs12107379; rs4130991-rs4680960; rs4130991-rs7612183; rs4130991-rs7628757; rs4130991-rs7653197; rs4130991-rs9853895; rs4130991-rs9857859; rs4264688-s4564923; rs4535189-rs6548621; rs4535189-rs6548628; rs4535189-rs6803202; rs4680960-rs7612183; rs4680960-rs7628757; r…	rs6803202 (p = 8.70*10-05 non-word repitition); rs7644521 (p = 0.0002 digits-forward memory span); rs1995402 (´P = 0.004 Reading and spelling PC); rs333491 (p = 0.004 Working memory) -> top result from each tablep	DysL & SLI	Language deficits, specifically with phonological buffer deficits (phonological buffer capacity assessed using non word repetition) => associations for verbal storage for twenty-two SNPs (linked to phonological span)	1177 individuals (1111 for the language assessment) with relevant phenotype and genotyping data	Australia, Caucasian	Candidate Gene Study	4
ROBO1	rs333491; rs6803202; rs7644521; rs9853895	.	rs333491 (p ≤ 0.001)	DysC & DysL	DD as a dichotomic trait; comorbid language and mathematical (dis)abilities => mathematics cognitive phenotypes, e.g., mental calculation (possible role in reduced mathematical skills)	493 unrelated nuclear families of probands with DD (804 offspring)	Italian	Linkage Analysis	41
ROBO1	rs331142; rs12495133	.	rs331142 (p = 0.001, Toronto sample); rs12495133 (p = 0.007, Calgary sample/ 0.005 Toronto sample)	DysL	RD	Toronto sample => 1416 individuals from 421 families, each with at least one child who exhibited difficulties in reading; Calgary sample => 95 families including 207 affected children	Canada, Caucasian	Candidate Gene Study	67
TUBGCP5	15q11.2 (BP1–BP2) deletion	.	p = 1.4x10− 4; CNV (deletion)	DysC & DysL	Cognitive, structural, and functional correlates of DysL and DysC (combined phenotype)	71 subjects carrying the 15q11.2 (BP1–BP2) deletion in the absence of a schizophrenia, bipolar disorder, autism or intellectual disability diagnosis; 643 controls not carrying CNVs associated with psychiatric disorders	Icelandic population	Candidate Gene Study	69
ZNF385D	rs259521; rs1679255; rs9814232; rs12636438	rs259521-rs1679255; rs259521-rs9814232; rs259521-rs12636438; rs1679255-rs9814232; rs1679255-rs12636438; rs9814232-rs12636438	rs259521 (p = 2.42*10-6); rs1679255 (p = 6.87*10-7); rs9814232 (p = 1.3*10-6); rs12636438 (p = 5.45*10-7); rs1679255 and rs12636438 replicated	DysL & SLI	Receptive vocabulary measures; contribution to language => no association with RD or LI individually	527 subjects defined as RD cases; 337 subjects defined as LI cases; 174 individuals affected with both RD and LI (ALSPAC cohort); 440 individuals for replication (PING study)	European	GWAS	16
Footnotes:
1 Pairwise linkage disequilibrium (LD; r2 ≧ 0.8) was tested using LDlink and the CEU population (https://ldlink.nci.nih.gov)
Abbreviations:
DD = developmental dyslexia
IQ = intelligence quotient
LI = language impairment
RD = reading disabilities
