# Supplementary material for: Identification of Phonology-Related Genes and Functional Characterization of Broca’s and Wernicke’s Regions in Language and Learning Disorders
Source: Front Neurosci. 2021 Sep 3;15:680762. doi: 10.3389/fnins.2021.680762 (PMC8446646; doi:10.3389/fnins.2021.680762)
Supplement: Supplementary Table 8 — Total results of the functional enrichment analysis of phonology-related genes. [file Table_8.XLSX]

## Sheet: S8
Table S8. Total results of the functional enrichment analysis of phonology-related genes.
Term category	Term name	Term identifier	p-value#	q-value Bonferroni#	Hit Count in Genome	Hit in Query List
GO: Biological Process	response to auditory stimulus	GO:0010996	2.671e-06	0.002714	28	CNTNAP2,FOXP2,KIAA0319
GO: Biological Process	dendrite development	GO:0016358	1.054e-05	0.01071	310	CYFIP1,DCDC2,KIAA0319,RBFOX2,ROBO1
GO: Biological Process	cellular component morphogenesis	GO:0032989	1.745e-05	0.01773	914	CCDC136,CNTNAP2,CYFIP1,DCDC2,KIAA0319,RBFOX2,ROBO1
GO: Biological Process	vocal learning	GO:0042297	1.947e-05	0.01979	7	CNTNAP2,FOXP2
GO: Biological Process	imitative learning	GO:0098596	1.947e-05	0.01979	7	CNTNAP2,FOXP2
GO: Biological Process	cognition	GO:0050890	2.637e-05	0.02679	375	CNTNAP2,CYFIP1,DCDC2,DNAAF4,FOXP2
GO: Biological Process	observational learning	GO:0098597	3.335e-05	0.03388	9	CNTNAP2,FOXP2
GO: Biological Process	cell morphogenesis involved in neuron differentiation	GO:0048667	4.861e-05	0.04939	715	CYFIP1,DCDC2,KIAA0319,RBFOX2,RIPOR2,ROBO1
GO: Biological Process	learned vocalization behavior or vocal learning	GO:0098598	5.088e-05	0.0517	11	CNTNAP2,FOXP2
GO: Biological Process	muscle fiber development	GO:0048747	5.135e-05	0.05217	74	FLNC,MYO18B,RIPOR2
GO: Cellular Component	neuron projection membrane	GO:0032589	5.69e-05	0.009502	73	CNTNAP2,RIPOR2,ROBO1
GO: Biological Process	neuron projection morphogenesis	GO:0048812	7.345e-05	0.07462	770	CNTNAP2,CYFIP1,DCDC2,KIAA0319,RBFOX2,ROBO1
GO: Biological Process	plasma membrane bounded cell projection morphogenesis	GO:0120039	8.174e-05	0.08305	785	CNTNAP2,CYFIP1,DCDC2,KIAA0319,RBFOX2,ROBO1
GO: Biological Process	auditory behavior	GO:0031223	8.404e-05	0.08539	14	CNTNAP2,FOXP2
GO: Biological Process	cell projection morphogenesis	GO:0048858	8.467e-05	0.08602	790	CNTNAP2,CYFIP1,DCDC2,KIAA0319,RBFOX2,ROBO1
GO: Biological Process	response to mechanical stimulus	GO:0009612	8.485e-05	0.08621	243	CNTNAP2,FOXP2,KIAA0319,RIPOR2,
GO: Biological Process	cell part morphogenesis	GO:0032990	9.657e-05	0.09811	809	CNTNAP2,CYFIP1,DCDC2,KIAA0319,RBFOX2,ROBO1
GO: Biological Process	cell morphogenesis	GO:0000902	9.825e-05	0.09982	1197	CNTNAP2,CYFIP1,DCDC2,KIAA0319,RBFOX2,RIPOR2,ROBO1
GO: Biological Process	neuron projection development	GO:0031175	9.825e-05	0.09982	1197	CNTNAP2,CYFIP1,DCDC2,KIAA0319,RBFOX2,RIPOR2,ROBO1
GO: Biological Process	magnesium ion transmembrane transport	GO:1903830	0.0001107	0.1125	16	NIPA1,NIPA2
GO: Biological Process	magnesium ion transport	GO:0015693	0.0001254	0.1274	17	NIPA1,NIPA2
GO: Biological Process	mechanosensory behavior	GO:0007638	0.0001254	0.1274	17	CNTNAP2,FOXP2
GO: Molecular Function	magnesium ion transmembrane transporter activity	GO:0015095	0.0001325	0.01259	16	NIPA1,NIPA2
GO: Biological Process	cell morphogenesis involved in differentiation	GO:0000904	0.0001622	0.1648	889	CYFIP1,DCDC2,KIAA0319,RBFOX2,RIPOR2,ROBO1
GO: Biological Process	generation of neurons	GO:0048699	0.0001859	0.1889	1802	CNTNAP2,CYFIP1,DCDC2,DNAAF4,KIAA0319,RBFOX2,RIPOR2,ROBO1
GO: Cellular Component	axolemma	GO:0030673	0.0002122	0.03543	21	CNTNAP2,ROBO1
GO: Biological Process	striatum development	GO:0021756	0.0002123	0.2157	22	CNTNAP2,FOXP2
GO: Biological Process	neuron development	GO:0048666	0.0002166	0.2201	1358	CNTNAP2,CYFIP1,DCDC2,KIAA0319,RBFOX2,RIPOR2,ROBO1
GO: Biological Process	vocalization behavior	GO:0071625	0.0002324	0.2361	23	CNTNAP2,FOXP2
GO: Biological Process	plasma membrane bounded cell projection organization	GO:0120036	0.0002345	0.2383	1863	CNTNAP2,CYFIP1,DCDC2,DNAAF4,KIAA0319,RBFOX2,RIPOR2,ROBO1
GO: Biological Process	cell projection organization	GO:0030030	0.0002728	0.2772	1904	CNTNAP2,CYFIP1,DCDC2,DNAAF4,KIAA0319,RBFOX2,RIPOR2,ROBO1
GO: Biological Process	learning or memory	GO:0007611	0.0002813	0.2858	332	CNTNAP2,DCDC2,DNAAF4,FOXP2
GO: Biological Process	regulation of dendrite development	GO:0050773	0.0002861	0.2907	132	CYFIP1,KIAA0319,ROBO1
GO: Biological Process	neurogenesis	GO:0022008	0.0003106	0.3155	1940	CNTNAP2,CYFIP1,DCDC2,DNAAF4,KIAA0319,RBFOX2,RIPOR2,ROBO1
GO: Biological Process	striated muscle cell development	GO:0055002	0.000326	0.3312	138	FLNC,MYO18B,RIPOR2
GO: Biological Process	cerebral cortex development	GO:0021987	0.000333	0.3383	139	CNTNAP2,FOXP2,ROBO1
GO: Biological Process	subpallium development	GO:0021544	0.0003462	0.3517	28	CNTNAP2,FOXP2
GO: Biological Process	neuron differentiation	GO:0030182	0.0006859	0.6969	1639	CNTNAP2,CYFIP1,DCDC2,KIAA0319,RBFOX2,RIPOR2,ROBO1
GO: Biological Process	nervous system process	GO:0050877	0.0007012	0.7124	1645	CNTNAP2,CYFIP1,FOXP2,DCDC2,DNAAF4,RBFOX2,RIPOR2
GO: Cellular Component	early endosome	GO:0005769	0.0007379	0.1232	408	CNTNAP2,KIAA0319,NIPA1,NIPA2
GO: Cellular Component	supramolecular polymer	GO:0099081	0.0007562	0.1263	1580	COL4A2,CYFIP1,DCDC2,FLNC,MYO18B,RIPOR2,TUBGCP5
GO: Biological Process	dendrite morphogenesis	GO:0048813	0.0007788	0.7913	186	DCDC2,RBFOX2,ROBO1
GO: Biological Process	regulation of plasma membrane bounded cell projection organization	GO:0120035	0.000817	0.8301	782	CYFIP1,DCDC2,KIAA0319,RIPOR2,ROBO1
GO: Biological Process	learning	GO:0007612	0.0008538	0.8675	192	CNTNAP2,DCDC2,FOXP2
GO: Biological Process	regulation of axonogenesis	GO:0050770	0.0008668	0.8807	193	CYFIP1,KIAA0319,ROBO1
GO: Biological Process	regulation of cell projection organization	GO:0031344	0.0009054	0.9199	800	CYFIP1,DCDC2,KIAA0319,RIPOR2,ROBO1
GO: Biological Process	pallium development	GO:0021543	0.0009333	0.9483	198	CNTNAP2,FOXP2,ROBO1
GO: Biological Process	neuron migration	GO:0001764	0.000947	0.9622	199	DCDC2,DNAAF4,KIAA0319
GO: Biological Process	negative regulation of protein localization to cell leading edge	GO:1905872	0.0009904	1	1	RIPOR2
GO: Biological Process	caudate nucleus development	GO:0021757	0.0009904	1	1	FOXP2
GO: Biological Process	putamen development	GO:0021758	0.0009904	1	1	FOXP2
GO: Biological Process	negative regulation of establishment of T cell polarity	GO:1903904	0.0009904	1	1	RIPOR2
GO: Cellular Component	leading edge membrane	GO:0031256	0.001026	0.1714	195	CNTNAP2,RIPOR2,ROBO1
GO: Cellular Component	cell leading edge	GO:0031252	0.001239	0.2069	469	CNTNAP2,CYFIP1,RIPOR2,ROBO1
GO: Biological Process	muscle cell development	GO:0055001	0.001315	1	223	FLNC,MYO18B,RIPOR2
GO: Cellular Component	actin cytoskeleton	GO:0015629	0.00139	0.2321	837	CYFIP1,DCDC2,FLNC,MYO18B,RIPOR2
GO: Biological Process	multicellular organismal signaling	GO:0035637	0.001401	1	228	CNTNAP2,DCDC2,RBFOX2
GO: Biological Process	regulation of plasma membrane bounded cell projection assembly	GO:0120032	0.001491	1	233	CYFIP1,DCDC2,RIPOR2
GO: Biological Process	regulation of cell projection assembly	GO:0060491	0.001528	1	235	CYFIP1,DCDC2,RIPOR2
GO: Biological Process	neuron recognition	GO:0008038	0.001591	1	60	CNTNAP2,ROBO1
GO: Biological Process	intracellular estrogen receptor signaling pathway	GO:0030520	0.001697	1	62	DNAAF4,RBFOX2
GO: Biological Process	response to abiotic stimulus	GO:0009628	0.001759	1	1391	CNTNAP2,CYFIP1,DCDC2,FOXP2,KIAA0319,RIPOR2
GO: Biological Process	negative regulation of axon extension involved in regeneration	GO:0048692	0.001978	1	2	KIAA0319
GO: Biological Process	chemorepulsion involved in postnatal olfactory bulb interneuron migration	GO:0021836	0.001978	1	2	ROBO1
GO: Biological Process	regulation of protein localization to cell leading edge	GO:1905871	0.001978	1	2	RIPOR2
GO: Biological Process	negative regulation of negative chemotaxis	GO:0050925	0.001978	1	2	ROBO1
GO: Biological Process	negative regulation of Rho guanyl-nucleotide exchange factor activity	GO:2001107	0.001978	1	2	RIPOR2
GO: Biological Process	superior temporal gyrus development	GO:0071109	0.001978	1	2	CNTNAP2
GO: Cellular Component	actin filament	GO:0005884	0.002079	0.3472	540	CYFIP1,DCDC2,MYO18B,RIPOR2
GO: Cellular Component	supramolecular complex	GO:0099080	0.002211	0.3692	1895	COL4A2,CYFIP1,DCDC2,FLNC,MYO18B,RIPOR2,TUBGCP5
GO: Biological Process	organelle assembly	GO:0070925	0.002295	1	986	CCDC136,DCDC2,DNAAF4,RIPOR2,TUBGCP5
GO: Biological Process	developmental growth involved in morphogenesis	GO:0060560	0.002543	1	281	CYFIP1,KIAA0319,ROBO1
GO: Cellular Component	stereocilium bundle	GO:0032421	0.002711	0.4527	75	DCDC2,RIPOR2
GO: Cellular Component	stereocilium	GO:0032420	0.002711	0.4527	75	DCDC2,RIPOR2
GO: Biological Process	telencephalon development	GO:0021537	0.00289	1	294	CNTNAP2,FOXP2,ROBO1
GO: Biological Process	negative regulation of synaptic vesicle recycling	GO:1903422	0.002966	1	3	CYFIP1
GO: Biological Process	negative regulation of sprouting of injured axon	GO:0048688	0.002966	1	3	KIAA0319
GO: Biological Process	postnatal olfactory bulb interneuron migration	GO:0021827	0.002966	1	3	ROBO1
GO: Biological Process	cerebral cortex tangential migration using cell-cell interactions	GO:0021823	0.002966	1	3	ROBO1
GO: Biological Process	substrate-dependent cerebral cortex tangential migration	GO:0021825	0.002966	1	3	ROBO1
GO: Biological Process	innate vocalization behavior	GO:0098582	0.002966	1	3	FOXP2
GO: Biological Process	mammary gland epithelium development	GO:0061180	0.003089	1	84	ATP2C2,ROBO1
GO: Cellular Component	peripheral region of growth cone	GO:0090725	0.003105	0.5186	3	CYFIP1
GO: Cellular Component	excitatory synapse	GO:0060076	0.003153	0.5266	81	CNTNAP2,CYFIP1
GO: Cellular Component	main axon	GO:0044304	0.003386	0.5655	84	CNTNAP2,ROBO1
GO: Cellular Component	supramolecular fiber	GO:0099512	0.004235	0.7072	1572	CYFIP1,DCDC2,FLNC,MYO18B,RIPOR2,TUBGCP5
# p-value of the underlying hypergeometric probability mass function. Bold, p-value stable against correction for multiple comparisons (Bonferroni adjusted q-value < 0.05).
