# Supplementary material for: Identification of Phonology-Related Genes and Functional Characterization of Broca’s and Wernicke’s Regions in Language and Learning Disorders
Source: Front Neurosci. 2021 Sep 3;15:680762. doi: 10.3389/fnins.2021.680762 (PMC8446646; doi:10.3389/fnins.2021.680762)
Supplement: Supplementary Table 9A — Follow-up gene expression analysis in the frontal lobe—Phonology-related genes—Broca’s region vs. premotor areas. [file Table_9.xlsx]

## Sheet: S9A
Table S9A. Follow-up gene expression analysis in the frontal lobe - Phonology-related genes - Broca's region versus premotor region.
Gene	Expression levels (mean z-score and standard deviation)		p-value
	Broca's region (n tissue samples = 25)	Premotor region (n tissue samples = 30)
CNTNAP2	0.507 ± 0.241	0.306 ± 0.217	0.001*
DCDC2	0.593 ± 0.624	0.027 ± 0.495	0.002*
FOXP2	0.270 ± 0.321	0.067 ± 0.336	0.019
KIAA0319	-0.041 ± 0.266	-0.280 ± 0.387	0.028
DYX1C1	-0.024 ± 0.193	-0.161± 0.300	0.051
NIPA1	-0.437 ± 0.494	-0.196 ± 0.384	0.066
MYO18B	-0.263 ± 0.464	0.052 ± 0.628	0.103
ZNF385D	0.076 ± 0.137	0.118 ± 0.191	0.151
RBFOX2	0.272 ± 0.356	0.044 ± 0.513	0.237
RIPOR2	0.335 ± 0.240	0.209 ± 0.285	0.245
ROBO1	-0.409 ± 0.331	-0.520 ± 0.352	0.248
CMAHP	0.469 ± 0.241	0.423 ± 0.318	0.371
FLNC	-0.281 ± 0.536	-0.140 ± 0.525	0.446
NOP9	-0.237± 0.683	-0.165 ± 0.461	0.485
NIPA2	0.444 ± 0.405	0.372 ± 0.338	0.53
TUBGCP5	0.500 ± 0.328	0.452 ± 0.428	0.604
CYFIP1	0.222 ± 0.366	0.243 ± 0.471	0.75
CMIP	0.065 ± 0.479	0.043 ± 0.402	0.762
COL4A2	0.088 ± 0.563	0.794 ± 0.636	0.86
ATP2C2	0.501 ± 0.242	0.525 ± 0.333	0.95
CCDC136	-0.309 ± 0.394	-0.361 ± 0.363	0.958
* Stable against correction for multiple comparisons (family-wise error, FWE)

## Sheet: S9B
Table S9B. Follow-up gene expression analysis in the temporal lobe - Phonology-related genes - Wernicke's region versus fusiform gyrus.
Gene	Expression levels (mean z-score and standard deviation)		p-value
	Wernicke's region (n tissue samples = 17)	Fusiform gyrus (n tissue samples = 57)
DYX1C1	0.354 ± 0.262	-0.054± 0.535	0.023
KIAA0319	-0.079 ± 0.259	0.032 ± 0.409	0.045
MYO18B	-0.071 ± 0.657	-0.328 ± 0.493	0.136
ROBO1	-0.373 ± 0.400	-0.327 ± 0.408	0.179
TUBGCP5	0.493 ± 0.422	0.211 ± 0.525	0.19
CNTNAP2	0.411 ± 0.305	0.184 ± 0.691	0.263
FOXP2	0.528 ± 0.254	0.370 ± 0.525	0.325
COL4A2	0.222 ± 0.384	0.046 ± 0.568	0.358
ZNF385D	0.012 ± 0.320	0.034 ± 0.385	0.373
CYFIP1	0.402 ± 0.477	0.197 ± 0.647	0.474
NOP9	-0.082± 0.732	-0.139 ± 0.629	0.489
RBFOX2	0.139 ± 0.509	0.313 ± 0.451	0.585
RIPOR2	0.433 ± 0.350	0.314 ± 0.566	0.614
FLNC	-0.298 ± 0.667	-0.199 ± 0.569	0.627
ATP2C2	0.182 ± 0.337	0.046 ± 0.694	0.705
CMIP	0.126 ± 0.432	0.084 ± 0.642	0.709
NIPA1	-0.292 ± 0.439	-0.259 ± 0.520	0.744
DCDC2	0.543 ± 0.563	0.418 ± 0.614	0.93
NIPA2	0.300 ± 0.303	0.180 ± 0.615	0.949
CCDC136	-0.368 ± 0.574	-0.209 ± 0.550	0.969
CMAHP	0.346 ± 0.316	0.321 ± 0.562	0.988

## Sheet: S9C
Table S9C. Follow-up gene expression analysis - Random genes - Broca's region versus Wernicke's region.
Gene	Expression levels (mean z-score and standard deviation)		p-value
	Broca's region (n tissue samples = 25)	Wernicke's region (n tissue samples = 17)
C8orf33	0.059 ± 0.479	-0.003 ± 0.527	0.287
FZD10	-0.383 ± 0.376	-0.202 ± 0.554	0.461
TNIP1	-0.124 ± 0.438	-0.163 ± 0.569	0.492
SHOC1	-0.470 ± 0.510	-0.100 ± 0.548	0.445
NPIPB4	-0.072 ± 0.367	-0.052 ± 0.564	0.265
ASAH1	-0.770 ± 0.401	-0.546 ± 0.453	0.162
ASPM	0.211 ± 0.490	0.300 ± 0.477	0.573
PTCD1	0.438 ± 0.402	0.141 ± 0.577	0.07
FBXW11	0.051 ± 0.494	-0.045 ± 0.535	0.781
CBFB	-0.238 ± 0.516	-0.228 ± 0.500	0.823
GREM1	0.162 ± 0.502	0.318 ± 0.504	0.58
CERKL	-0.458 ± 0.168	-0.340 ± 0.253	0.651
LENEP	-0.427 ± 0.595	-0.296 ± 0.400	0.815
HTR3C	-0.316 ± 0.316	-0.295 ± 0.317	0.608
GPS2	0.563 ± 0.600	-0.070 ± 0.622	0.054
LCE5A	-0.092 ± 0.438	0.139 ± 0.700	0.118
THAP7-AS1	-0.052 ± 0.345	0.009 ± 0.219	0.33
KLHL34	-0.307 ± 0.551	-0.031 ± 0.687	0.579
ELAVL2	0.114 ± 0.305	0.163 ± 0.267	0.122
SSR4P1	-0.029 ± 0.390	-0.048 ± 0.471	0.315
OR5D13	-0.209 ± 0.743	-0.086 ± 1.126	0.665
FNDC8	-0.297 ± 0.697	-0.144 ± 0.682	0.358
TMEM206	-0.268 ± 0.563	-0.268 ± 0.537	0.111
GDF2	-0.211 ± 0.430	0.122 ± 1.212	0.072
SIGMAR1	-0.217 ± 0.447	-0.062 ± 0.472	0.053

## Sheet: S9D
Table S9D. Follow-up gene expression analysis - Color genes - Broca's region versus Wernicke's region.
Gene	Expression levels (mean z-score and standard deviation)		p-value
	Broca's region (n tissue samples = 25)	Wernicke's region (n tissue samples = 17)
ASIP	-0.256 ± 0.550	-0.107 ± 0.764	0.092
BNC2	-0.418 ± 0.325	-0.371 ± 0.250	0.821
EIF2S2	0.111 ± 0.347	-0.014 ± 0.386	0.371
GSS	0.534 ± 0.354	0.325 ± 0.437	0.133
HERC2	0.300 ± 0.686	0.392 ± 0.618	0.82
IRF4	-0.399 ± 0.564	-0.243 ± 0.476	0.516
MC1R	-0.179 ± 0.397	-0.315 ± 0.411	0.97
OCA2	0.676 ± 0.361	0.760 ± 0.363	0.872
RALY	0.649 ± 0.439	0.224 ± 0.454	0.038
SLC24A4	0.330 ± 0.334	0.467 ± 0.291	0.192
SLC24A5	-0.082 ± 0.464	-0.234 ± 0.367	0.905
SLC45A2	-0.179 ± 0.118	0.598 ± 0.860	0.338
TYR	-0.007 ± 0.446	-0.087 ± 0.583	0.324
VASH2	-0.297 ± 0.552	-0.167 ± 0.413	0.198
